# Supplementary material for: Genome analysis of orf virus isolates from goats in the Fujian Province of southern China
Source: Front Microbiol. 2015 Oct 23;6:1135. doi: 10.3389/fmicb.2015.01135 (PMC4616995; doi:10.3389/fmicb.2015.01135)
Supplement: Table S1 — ORFs of YX compared with the corresponding of ORFV strains GO, SJ1, NZ2 and SA00. [file TableS1.XLS]

## Sheet: Sheet1
ORF	YX			GO			NP			SJ1			SA00			NA11			IA82			NZ2		Predicted function
	Nucleotide	Length(aa)		Length(aa)	% Id (aa)		Length(aa)	% Id (aa)		Length(aa)	% Id (aa)		Length(aa)	% Id (aa)		Length(aa)	% Id (aa)		Length(aa)	% Id (aa)		Length(aa)	% Id (aa)
	Position
1	3215-2766	149		149	100		149	98		149	84.6		150	78.7		149	78.5		149	80.5		149	81.9
2	3725-3378	115		115	98.3		29	100		115	99.1		72	97.2		102	87.3		72	100		102	87.3	NF-κB-p65 acetylation inhibitor
5	4748-4485	87		87	100		96	68.8		51	64.7		51	72.6		51	70.6		51	76.5		51	76.5
7	5314-4832	160		160	100		160	98.8		160	98.1		160	96.9		161	91.9		160	92.5		160	94.4	dUTPase
8	6930-5380	516		516	99.6		516	99.8		516	99.4		516	98.3		516	91.3		516	91.1		516	90.9	Ankyrin/F-box protein
9	8435-7110	441		441	99.6		442	97.1		442	95		441	98		442	93.4		442	93.9		442	93.7
10	10424-8493	643		643	99.4		643	98.8		643	98.4		643	98.8		643	97.7		643	98.4		643	97.8	EEV maturation protein
11	11632-10496	378		378	99.5		378	99.5		378	98.9		378	98.9		378	98.4		378	97.9		378	97.4	EEV envelope phospholipase
12	11930-11661	89		89	95.5		89	94.4		89	93.3		89	97.8		89	85.4		89	85.4		89	84.3
12.5	12192-12010	60		60	100		60	98.3		60	98.3		60	100		60	98.3		60	96.7		60	96.7
13	12240-12479	79		79	97.5		79	98.7		79	98.7		79	96.2		79	91.1		79	89.9		79	92.4
14	12810-12523	95		95	100		93	97.9		95	97.9		91	94.5		91	95.6		91	94.5		91	95.6	RING-H2 motif protein
15	14432-12813	539		539	99.4		539	98.1		539	98		539	97		539	95.4		539	95.2		539	94.8
16	15277-14501	258		258	99.2		260	98.1		260	97.3		260	94.2		260	93.5		260	93.9		260	92.3
17	15537-15854	105		105	100		105	100		105	96.2		105	97.1		105	96.2		105	96.2		105	96.2	DNA-binding phosophoprotein
18	17300-15882	472		472	99.6		472	99.4		472	99.2		472	99.8		472	98.7		472	98.5		472	98.5	Poly(A)-polymerase catalytic subunit PAPL
19	19485-17308	725		725	99.2		725	99		725	98.9		725	98.5		725	97		725	97.4		725	97.1
20	20167-19616	183		183	96.7		183	98.9		183	96.2		183	96.2		183	92.4		183	92.4		183	92.4	DsRNA-binding, interferon resistance
21	20778-20197	193		193	99.5		193	99		193	99.5		193	97.4		193	97.4		193	96.9		193	96.9	RNA-polymerase subunit RPO30
22	20865-22568	567		567	99.7		567	99.8		567	99.3		567	99.5		567	98.9		567	99.1		567	99.1	Pox virus E6 proteins
23	22589-23407	272		272	100		272	100		272	100		272	100		272	100		272	100		272	100	Membrane protein
24	23467-24345	292		292	99.7		292	98.6		292	97.3		292	98.3		292	90.8		292	92.8		292	91.8	NF-κB pathway inhibitor
25	27372-24346	1008		1008	99.9		1008	99.9		1008	100		1008	99.7		1008	99.4		1008	99.5		1008	99.4	DNA-polymerase
26	27402-27692	96		96	100		96	100		96	100		96	100		96	100		96	100		96	100	ERV/ALR-like protein(IMV redox protein)
27	28102-27689	137		137	97.8		137	100		137	99.3		137	99.3		137	97.8		137	99.3		137	98.5	Virion core protein
28	30245-28089	718		718	99.3		718	98.9		718	98.5		720	95.1		718	96		718	96.1		718	96.2	DNA-binding protein
29	32681-30288	797		797	99.8		797	99.4		797	98.8		797	99.3		797	96.6		797	96.1		797	95.9
30	33873-32908	321		321	98.1		321	98.4		321	98.4		321	97.8		321	98.4		321	98.1		321	98.1	DNA-binding virion protein
31	34095-33883	70		70	100		70	100		70	100		70	100		70	100		70	100		70	100
32	34962-34105	285		286	98.3		285	98.3		285	97.9		285	94.4		286	93		285	93.7		285	93.7	DNA-binding phosphoprotein
33	35231-34995	78		78	100		78	100		78	100		78	96.2		78	97.4		78	96.2		78	96.2	IMV membrane protein
34	36401-35232	389		389	100		389	99.5		389	99.7		389	99.7		389	99.2		389	99.5		389	99.7	Telomere-binding protein
35	37690-36398	430		430	99.8		430	99.5		430	99.8		430	99.3		430	99.5		430	99.5		430	99.3	Virion core protease
36	37696-39747	683		683	100		683	99.9		683	100		683	99.6		683	99.6		683	99		683	99.4	RNA helicase NPH-II
37	41533-39722	603		603	99.5		603	99.5		603	99.5		603	99.7		603	98.7		603	99		603	99.2	Zn-protease, virion morphogenesis
38	41870-42565	231		231	100		231	100		231	99.1		231	99.1		231	98.7		231	99.6		231	100	Late transcription elongation factor
39	41876-41544	110		110	100		110	99.1		110	98.2		110	98.2		110	94.6		110	94.6		110	96.4
40	42903-42490	137		137	99.3		137	99.3		137	97.1		137	99.3		137	97.1		137	99.3		137	99.3	Glutaredoxin-like protein
41	42906-44264	452		452	99.3		452	98.5		452	98.7		452	99.1		452	95.1		452	96.9		452	97.4
42	44266-44457	63		63	100		63	100		63	98.4		63	96.8		63	95.2		63	96.8		63	96.8	RNA-polymerase subunit RPO7
43	44476-45033	185		185	99.5		185	100		185	100		185	100		185	98.4		185	97.8		185	97.8
44	46226-45030	398		395	99		395	98.7		398	98.7		398	98.2		398	98.2		398	98.2		398	96.5	Virion core protein
45	46259-47059	266		266	100		266	100		266	100		266	100		266	99.6		266	100		266	100	Late transcription factor VLTF-1
46	47066-48070	334		334	99.7		334	100		334	95.8		334	95.5		334	96.1		334	97.9		334	97.9	Myristylated protein
47	48071-48805	244		244	100		244	100		244	100		244	99.2		244	98.4		244	98		244	97.1	Myristylated IMV envelope protein
48	48851-49123	90		90	100		90	100		90	100		90	98.9		90	100		90	100		90	100
49	50383-49130	417		418	98.1		417	99.3		418	96.7		417	97.8		417	97.4		419	96.4		419	96.4
50	50413-51192	259		259	99.6		259	99.6		259	98.1		259	98.1		259	97.3		259	96.9		259	96.5	DNA-binding virion core protein VP8
51	51215-51601	128		128	98.4		128	96.9		128	98.4		128	97.7		128	96.1		128	96.9		128	95.3	Membrane protein
52	51555-52010	151		151	100		151	100		151	98.7		151	98.7		151	98.7		151	98		151	98	IMV membrane protein
53	52080-53090	336		336	99.7		336	99.7		336	99.7		336	99.4		336	99.7		336	98.8		336	99.1	Poly(A)-polymerase small subunit VP39 PAPS
54	53005-53565	186		186	99.5		186	100		186	100		186	98.4		186	98.9		186	97.9		186	98.4	RNA-polymerase subunit RPO22
55	54019-53516	167		167	98.8		167	98.8		167	99.4		167	98.8		167	98.8		167	99.4		167	98.8	Late membrane protein
56	54102-57971	1289		1289	99.9		1289	99.9		1289	99.8		1289	99.9		1289	99.4		1289	99.4		1289	99.4	RNA-polymerase subunit RPO147
57	58560-58015	181		181	99.5		181	99.5		181	99.5		181	98.9		181	97.8		181	97.2		181	97.2	Tyrosine phosphatase, virus assembly
58	58580-59155	191		191	99.5		191	99.5		191	99		191	99.5		191	99.5		191	99.5		191	99.5	IMV, viral entry
59	60181-59159	340		340	97.1		342	97.1		342	96.8		342	95.9		340	96.2		340	95.9		340	94.4	Immunodominant envelope protein
60	62596-60182	804		804	99.8		804	99.5		804	99.9		804	99.6		804	99		804	99		804	99	RNA-polymerase associated protein RAP94
61	62707-63390	227		227	97.4		227	96.9		227	95.2		227	93.8		227	87.7		229	87.8		220	86.4	Late transcription factor VLTF4
62	63414-64370	318		318	98.7		318	99.4		318	99.1		318	99.1		318	98.7		318	98.4		318	98.7	DNA topoisomerase type I
63	64363-64779	138		138	100		138	100		138	100		138	97.8		138	97.8		137	98.5		137	99.3
64	64814-67339	841		841	99.8		841	99.8		841	99.2		841	99.5		841	99.8		841	99.5		841	99.6	mRNA capping enzyme large subunit
65	67771-67301	156		156	100		156	100		156	98.7		156	100		156	98.7		156	98.7		156	98.7	Virion protein
66	67755-68420	221		221	99.6		221	99.1		221	99.1		221	97.3		221	97.7		221	97.7		221	98.6	Virion protein
67	68420-69118	232		232	99.6		232	99.6		232	98.7		232	99.1		232	99.1		232	98.7		232	99.1	Uracil DNA glycosidase
68	69132-71495	787		787	99.9		787	99.9		787	99.9		787	99.5		787	99.4		787	99.1		787	99.4	NTPase
69	71502-73409	635		635	100		635	100		635	99.8		635	100		635	99.7		635	99.5		635	99.4	Early transcription factor
70	73446-74006	186		189	98.4		190	97.9		190	97.4		190	96.3		186	95.2		190	95.3		190	95.8	RNA-polymerase subunit RPO18
71	74036-74710	224		224	100		224	100		224	100		224	99.6		224	99.6		224	99.6		224	99.6	NPH-PPH downregulator (NTP pyrophosphohydrolase)
72	76616-74700	638		638	100		638	99.8		638	99.2		638	100		638	99.7		638	100		638	100	Transcription termination factor NPH-I
73	77247-76681	188		188	99.5		188	98.9		188	99.5		188	98.9		188	94.2		188	94.7		188	94.7
74	78163-77294	289		289	99.7		289	99.7		289	99.7		289	99.7		289	99.3		289	98.3		289	99.3	mRNA capping enzyme small subunit
75	79841-78204	545		545	99.6		545	99.6		545	99.8		545	99.6		545	99.8		545	99.3		545	99.3	Rifampicin resistance protein
76	80314-79862	150		150	100		150	100		150	100		150	100		150	98		150	98.7		150	98.7	Late transcription factor VLTF2
77	81027-80353	224		224	99.6		224	100		224	100		224	100		224	100		224	100		224	100	Late transcription factor VLTF3
78	81275-81024	83		83	100		83	100		83	100		83	100		79	96.2		79	96.2		79	96.2	Thioredoxin-like protein
79	83322-81286	678		678	100		678	100		678	100		678	99.4		678	97.8		678	97.8		678	97.9	Virion core protein P4b precursor
80	84273-83338	311		118	100		119	98.3		118	96.6		115	95.7		119	95		119	88.2		119	91.6	Virion core protein
81	84312-84833	173		173	99.4		173	100		173	100		173	100		135	100		135	100		135	100	RNA-polymerase subunit RPO19
82	85976-84840	378		378	100		378	100		378	99.2		378	98.9		378	98.9		378	98.4		377	98.4
83	88132-86012	706		706	100		706	99.9		706	100		706	99.6		706	99.3		706	99.6		706	99.3	Early transcription factor
84	88200-89111	303		303	100		303	99		303	100		303	99		303	99.7		303	100		303	100	Intermediate transcription factor VITF-3
85	89361-89080	93		93	100		93	100		93	100		93	97.9		93	100		93	100		93	100	Late virion membrane protein
86	92093-89376	905		905	99.6		905	99.7		905	99.8		905	99.8		905	99		905	98.6		905	98.2	Virion core protein P4a precursor
87	92108-93118	336		336	99.7		336	99.7		336	99.7		336	99.7		336	99.7		336	99.7		336	100	Virion formation
88	93898-93119	259		260	89.6		262	87.8		260	87.7		261	86.6		260	77.3		263	75.7		264	75	Virion core protein
89	94193-93915	92		92	98.9		92	98.9		92	97.8		92	98.9		92	96.7		92	96.7		92	97.8	Virion membrane protein
90	94492-94217	91		91	97.8		91	97.8		91	100		91	98.9		91	100		91	97.8		91	98.9	IMV phosphorylated membrane protein
91	94670-94509	53		53	100		53	100		53	100		53	100		53	98.1		53	100		53	100	IMV membrane protein
92	94940-94671	89		89	98.9		89	97.8		89	97.8		89	98.9		89	97.8		89	97.8		89	96.6
93	96003-94927	358		358	99.7		358	99.7		358	100		358	99.4		358	98.9		358	98.9		358	98.6	Myristylated protein
94	96619-96029	196		196	99		196	99		196	99		196	98.5		196	98.5		196	98.5		196	98	phosphorylated IMV membrane protein
95	96634-98100	488		488	99.8		488	99.8		488	99		488	99.4		488	98.8		488	98.8		488	99	DNA helicase
96	98344-98072	90		90	100		90	100		72	97.2		72	97.2		73	95.9		73	95.9		73	95.9	Zn-finger protein
97	98683-99972	429		429	99.1		429	99.3		428	99.1		429	97.7		429	97.7		429	97.4		429	97.7	DNA-polymerase processivity factor
98	98684-98358	108		108	99.1		108	100		108	100		108	100		108	97.2		108	97.2		108	97.2
99	99969-100409	146		146	100		146	100		146	100		146	100		146	100		146	100		146	100	Holliday junction resolvase
100	100432-101574	380		380	99.5		380	99.7		380	99.7		380	99.2		379	98.9		379	98.7		379	98.7	Intermediate transcription factor VITF-3
101	101599-105084	1161		1161	99.6		1161	99.7		1161	99.8		1161	99.7		1161	99.7		1161	99.8		1161	99.7	RNA-polymerase subunit RPO132
102	106778-105222	518		520	71		520	70.6		519	80.4		520	69.4		518	97.3		518	96.1		520	68.3	A-type inclusion protein/fusion peptide hybrid
103	108381-106816	521		531	51.8		531	51.6		523	67.5		531	51.8		522	96.6		522	96.2		531	51.2	A-type inclusion protein
104	108693-108421	90		88	80.7		91	80.2		90	86.7		90	82.2		90	92.2		90	86.7		90	84.4	Viral fusion peptide
105	109156-108734	140		140	100		140	98.6		140	98.6		140	98.6		140	98.6		140	99.3		140	98.6	IMV surface protein
106	110116-109172	314		314	99.7		314	98.4		314	99.7		314	98.7		314	99		314	98.7		314	98.4	RNA-polymerase subunit RPO35
107	110298-110116	60		60	100		60	96.7		60	98.3		60	96.7		60	95		60	95		60	95	Virion morphogenesis
107.5	110448-110299	49		49	100		49	98		49	100		49	100		49	100		49	87.8		49	91.8
108	111291-110467	274		275	99.3		274	99.6		275	98.9		274	99.6		274	97.5		273	94.9		246	100	DNA packaging protein/ATPase
109	111376-111855	159		165	48.5		161	78.3		161	78.3		165	48.5		161	69.6		160	80		162	71.6	EEV glycoprotein
110	111871-112368	165		166	49.4		165	85.5		165	86.1		166	49.4		165	86.1		165	94.6		165	84.9	EEV glycoprotein
111	112401-112940	179		179	97.8		179	99.4		179	98.3		179	96.7		179	93.3		179	94.4		179	93.9
112	113164-114009	281		281	81.9		272	84.9		264	76.9		288	91		288	80.6		275	77.1		276	80.1	chemokine binding protein
113	114082-114708	208		194	95.9		208	93.3		208	93.3		194	94.9		194	88.1		196	85.2		196	81.6
114	114752-115783	343		344	98.6					344	98.3		344	98.6		344	94.8		344	93.9		344	92.4
115	115906-116355	149		149	98.7					133	95.5		133	95.5		136	78.7		133	77.4		136	76.5
116	116424-117014	196		196	96.4					236	76.3		206	83.5		116	72.4		118	65.3		210	49.1
117	117185-117982	265		265	98.9								265	98.9		265	95.1		265	94.3		265	94.3	GM-CSF/IL-2 inhibition factor
118	118234-118542	102		102	100								102	98		102	98		102	96.1		102	95.1
119	118950-119528	192		204	94.1								204	92.7		168	86.3		202	90.6		202	91.1
120	119944-120522	192		192	95.3					193	89.6		195	75.4		194	77.3		200	73.5		201	75.1
121	120649-121557	302		267	99.3		302	99		302	98.7		302	99		302	86.4		302	88.4		308	87	NF-κB pathway inhibitor
122	121610-122581	323		323	99.4		323	99.7		323	99.1		323	99.7		323	93.2		323	94.1		323	93.2
123	122673-124250	525		525	99.8		525	99.6		525	99.2		525	99.2		525	95.4		513	96.1		525	96	Ankyrin/F-box protein
124	124286-125893	535		535	98.9		536	98.3		536	98.7		536	98.1		536	94.8		536	94.6		536	94.4
125	125986-126507	173		173	99.4		173	100		173	98.8		173	97.7		173	95.4		173	95.4		173	94.8	Apoptosis inhibitor
126	126618-128111	497		497	100		497	99.4		497	98.4		497	98.6		497	97		497	96.6		497	96.8	Ankyrin/F-box protein
127	128189-128746	185		185	100		185	100		185	99.5		184	98.4		185	97.8		185	95.1		185	97.8	IL-10-like protein
128	128915-130420	501		501	98.8		501	98.2		501	98.4		501	97		501	94.8		406	96.6		501	95.2	Ankyrin/F-box protein
129	130482-132032	516		516	99.4		516	99.6		516	99.4		516	98.5		516	93		520	92.1		520	91.5	Ankyrin/F-box protein
130	132113-133609	498		498	99.8		498	100		498	100		498	99.8		498	99.6		498	98.8		498	99	Serine/threonine protein kinase
131	133569-134246	225		225	92.9		208	90.4		208	93.8		208	92.3		208	95.2		208	92.8		208	94.2	Membrane protein
132	134295-134726	143		134	41		134	32.1		134	40.3		134	38.1		126	69.8		132	75		125	70.4	VEGF-like protein
134	135017-135466	149		149	100					149	84.6		150	78.7		149	78.5		149	80.5		149	81.9	hypothetical protein; Provisional
